# Supplementary material for: Phosphorylation of GAP-43 T172 is a molecular marker of growing axons in a wide range of mammals including primates
Source: PubMed Central journal article supplement (PMC8034164; doi:10.1186/s13041-021-00755-0), 2021-04-08
Supplement: 13041_2021_755_MOESM6_ESM.pdf [file 13041_2021_755_MOESM6_ESM.pdf]

# Figure S5

|                       |    |                   |     |
|-----------------------|----|-------------------|-----|
| Homo sapiens          | 89 | EAAPATGSKPDEPGKAG | 105 |
| Macaca fascicularis   | 89 | EAAPATGSKPDEPGKAG | 105 |
| Callithrix jacchus    | 89 | EAAPATGTKPDETGKAG | 105 |
| Mustela putorius furo | 90 | DAIPASGPKPEESGKAG | 106 |
| Rattus norvegicus     | 90 | DAAPATSPKAEEPSKAG | 106 |
| Mus musculus          | 90 | DAAPATSPKAEEPSKAG | 106 |

\*
