# Supplementary material for: Phosphorylation of GAP-43 T172 is a molecular marker of growing axons in a wide range of mammals including primates
Source: Springer Nature journal article supplement (doi:10.1186/s13041-021-00755-0), 2021-04-08

# Figure.S7

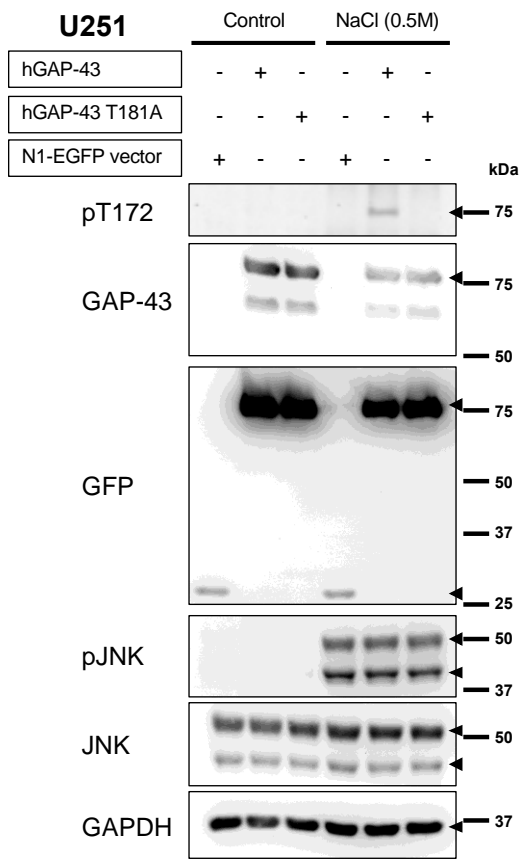

Supplement: MOESM8 [file 25664298]
